# Supplementary material for: Post-publication sharing of data and tools
Source: Springer Nature journal article supplement (doi:10.1038/461171a), 2009-09-01
Supplement: 41586_2009_BF461171a_MOESM247_ESM.pdf [file 41586_2009_BF461171a_MOESM247_ESM.pdf]

## CASIMIR Rome Meeting participants

Paul N. Schofield<sup>1</sup>, Tania Bubela<sup>2</sup>, Thomas Weaver<sup>3</sup>, Lili Portilla<sup>4</sup>, Stephen D. Brown<sup>5</sup>, John M. Hancock<sup>5</sup>, David Einhorn<sup>6</sup>, Glauco Tocchini-Valentini<sup>7</sup>, Martin Hrabe de Angelis<sup>8</sup>, Nadia Rosenthal<sup>9</sup>, Julie Barnes<sup>10</sup>, Amanda J. Collis<sup>11</sup>, Christian Desaintes<sup>12</sup>, Jack E. Dixon<sup>13</sup>, Alan Doyle<sup>14</sup>, Janan Eppig<sup>6</sup>, Dawn Field<sup>15</sup>, Michael Grünberger<sup>1</sup>, Sabina Heim<sup>16</sup>, Geoff Hicks<sup>17</sup>, Tim Hubbard<sup>18</sup>, Richard Jennings<sup>19</sup>, Karen Kennedy<sup>18</sup>, Gavin Kennedy<sup>20</sup>, Patrik Kolar<sup>12</sup>, Angus Livingstone<sup>21</sup>, Kent Lloyd<sup>22</sup>, Hiroshi Masuya<sup>23</sup>, Raffaele Matteoni<sup>7</sup>, Johannes Maurer<sup>24</sup>, Adrienne McKenzie<sup>20</sup>, Colin McKerlie<sup>25</sup>, Mark Moore<sup>14</sup>, Dawn Muddyman<sup>1</sup>, Thinkh Nguyen<sup>26</sup>, Mark Parsons<sup>27</sup>, John Quackenbush<sup>28</sup>, Eli Reuveni<sup>9</sup>, Ekaterina Salimova<sup>9</sup>, Vivian Siegal<sup>29</sup>, Malcolm Skingle<sup>30</sup>, Damian Smedley<sup>31</sup>, Andrew Sugden<sup>32</sup>, Shigeharu Wakana<sup>23</sup>, John P. Walsh<sup>33</sup>.

## Affiliations:

1. Department of Physiology, Development and Neuroscience, University of Cambridge, Downing Street, Cambridge, CB2 3EG UK
2. Department of Public Health Sciences, School of Public Health, University of Alberta, 3030 Research Transition Facility, Edmonton Alberta, T6G 2V2, Canada
3. MRC Mary Lyon Centre, Harwell, Didcot, Oxfordshire, OX11 ORD, UK
4. NIH, National Center for Research Resources, 6701 Democracy Blvd. Suite 900, Bethesda, MD 20892-4874. USA
5. MRC Harwell, Mammalian Genetics Unit, Harwell Science and Innovation Campus, Oxfordshire OX11 ORD, UK
6. The Jackson Laboratory, 600 Main Street, Bar Harbor, Maine 04609 USA
7. Istituto di Biologia Cellulare, CNR, Campus "A. Buzzati-Traverso" Via E. Ramarini, 32, I-00015 Monterotondo Scalo (Rome), Italy
8. Institute of Experimental Genetics, Helmholtz Zentrum München (HMGU), Munich, Germany
9. EMBL Monterotondo, Via Ramarini 32, 00015 Monterotondo (Rome), Italy.
10. Biowisdom, Harston Mill, Harston, Cambridge, CB22 7GG, UK
11. BBSRC, Department for Engineering, Data and Technologies, Polaris House, Swindon, SN2 1UH, UK
12. DG Research, Health, Genomics & Systems Biology, European Commission, CDMA, 1/8 B-1049 Brussels, Belgium.
13. Howard Hughes Medical Institute, Chevy Chase, Maryland, USA
14. The Wellcome Trust, 215 Euston Road, London, UK
15. NERC Environmental Genomics Thematic Programme Data Centre, CEH Oxford, Mansfield Road, Oxford OX3 1SR, UK
16. Ascenion GmbH, Inhoffenstraße 7 D-38124, Braunschweig, Germany
17. Manitoba Institute of Cell Biology, Winnipeg, 675 McDermot Avenue, Manitoba, Canada
18. The Wellcome Trust Sanger Institute, Wellcome Trust Genome Centre, Hinxton, Cambridge, UK
19. Cambridge Enterprise Ltd., University of Cambridge, 10 Trumpington Street, Cambridge, CB2 1QA, UK
20. Australian Phenomics Facility, The John Curtin School of Medical Research, The Australian National University, Canberra, Australia
21. University-Industry Liaison Office, University of British Columbia, Vancouver, British Columbia, Canada
22. School of Veterinary Medicine, University of California UC Davis, California, U.S.
23. RIKEN BioResource Center, Tsukuba, Ibaraki, Japan
24. imaGenes GmbH, Robert-Rössle-Str. 10, 13125 Berlin, Germany
25. The Toronto Centre for Phenogenomics, 25 Orde Street, Toronto, Ontario, M5T 3H7, Canada.
26. Creative Commons, 171 Second Street, Suite 300, San Francisco, California 94105, USA
27. National Snow and Ice Data Center/World Data Center for Glaciology, University of Colorado, 449 UCB, Boulder, Colorado 80309-0449, USA
28. Harvard School of Public Health, Department of Biostatistics and Computational Biology and Department of Cancer Biology, Dana-Farber Cancer Institute, 44 Binney Street, Boston, MA 02115, USA
29. Center for Science Communication, Vanderbilt University School of Medicine D-3100 Medical Center North Nashville, TN 37232-2358, USA
30. GlaxoSmithKline, Stevenage, SG1 2NY, UK
31. EMBL-Hinxton, European Bioinformatics Institute (EBI), Wellcome Trust Genome Campus, Hinxton, Cambridge, UK
32. AAAS Science International, 82-88 Hills Road, Bateman House, Cambridge, CB2 1LQ, UK
33. School of Public Policy, Georgia Institute of Technology, Atlanta, GA 30332-0345 Georgia, USA

## ACKNOWLEDGEMENTS

The Rome data and resource sharing meeting was funded by the European Commission through FP6 Coordination action CASIMIR (<http://www.casimir.org.uk>), LSHG-CT-2006-037811. The authors thank J.P. Kim for his comments and invaluable input to this report.
